# Supplementary figures and images for: Photocatalytic conversion of carbon dioxide, methane, and air for green fuels synthesis
Source: Royal Society of Chemistry journal article supplement (doi:10.1039/d3cy00675a), 2023-01-01

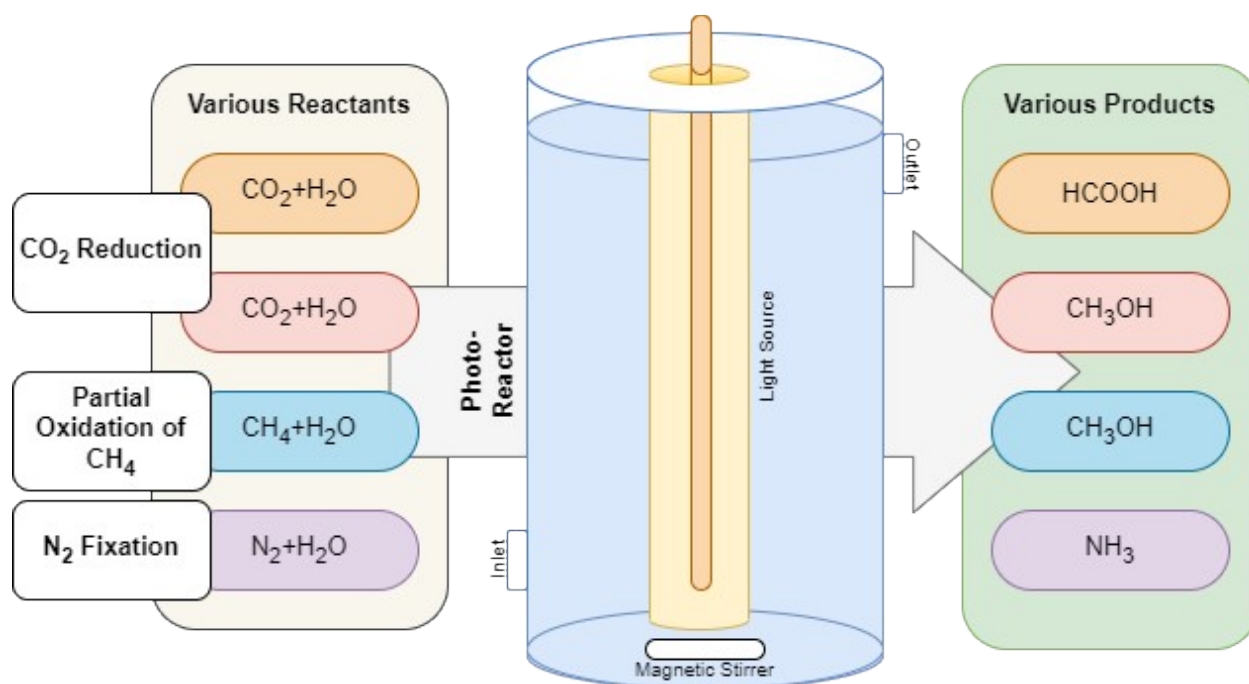

Supplement: d3cy00675a1.pdf [file d3cy00675a1.pdf]
